# Supplementary material for: Voltage-Driven Growth of Phosphorus Tribofilms
Source: Research Square preprint supplement (doi:10.21203/rs.3.rs-8888807/v1), 2026-02-22
Supplement: Supplementary file 1 [file 485cb2c4a9bcabce02fa6b8d.docx]

**Voltage-Driven Growth of Phosphorus Tribofilms**

Yun Zhaoa, Jie Zhanga, Hugh A. Spikesa, & Janet S.S. Wonga, *

a Department of Mechanical Engineering, Imperial College London, London SW7 2AZ, UK

*Email: [j.wong@imperial.ac.uk](mailto:j.wong@imperial.ac.uk) (Janet S.S. Wong)

**Figure S1.** Friction coefficient of 800 ppm BEPite in PAO2 under different applied voltages.


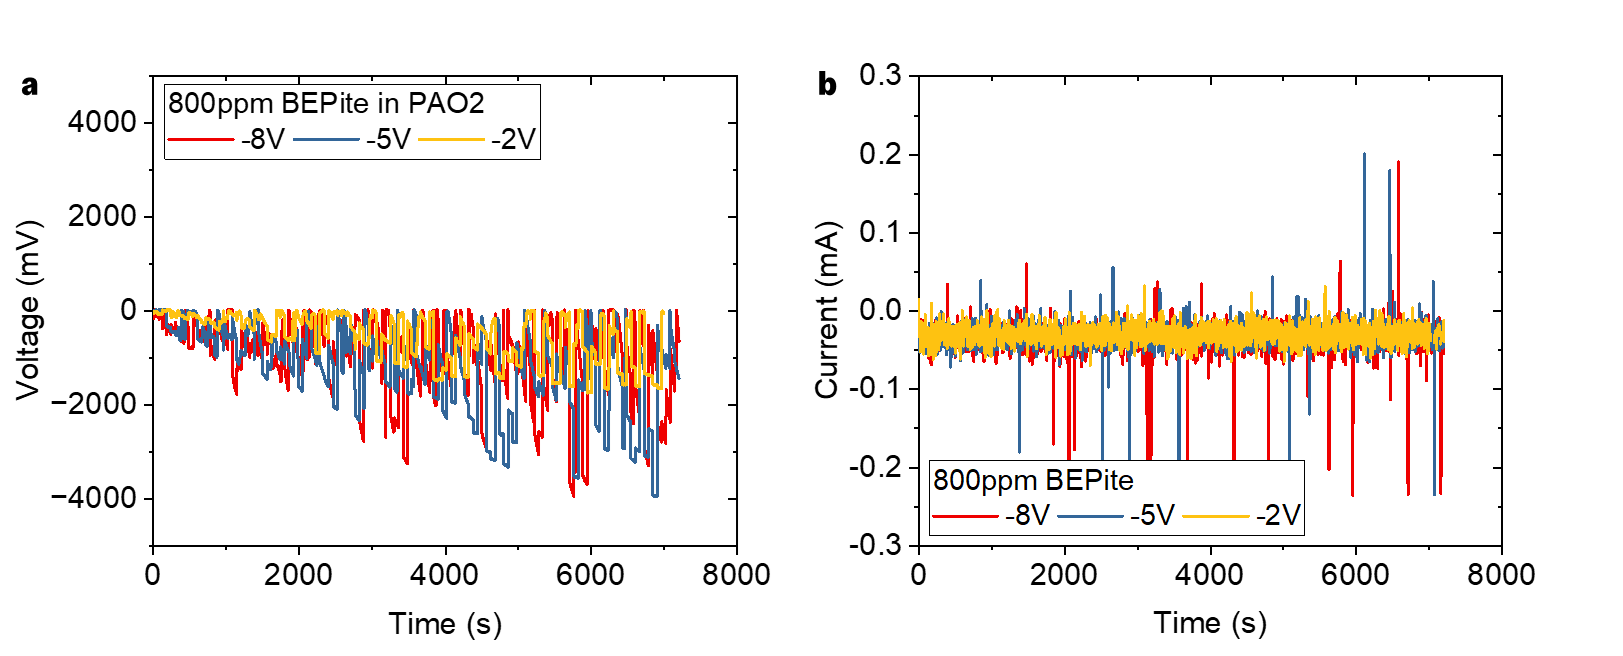


**Figure S2.** Real-time (**a**) voltage and (**b**) current recorded under various applied voltage conditions.


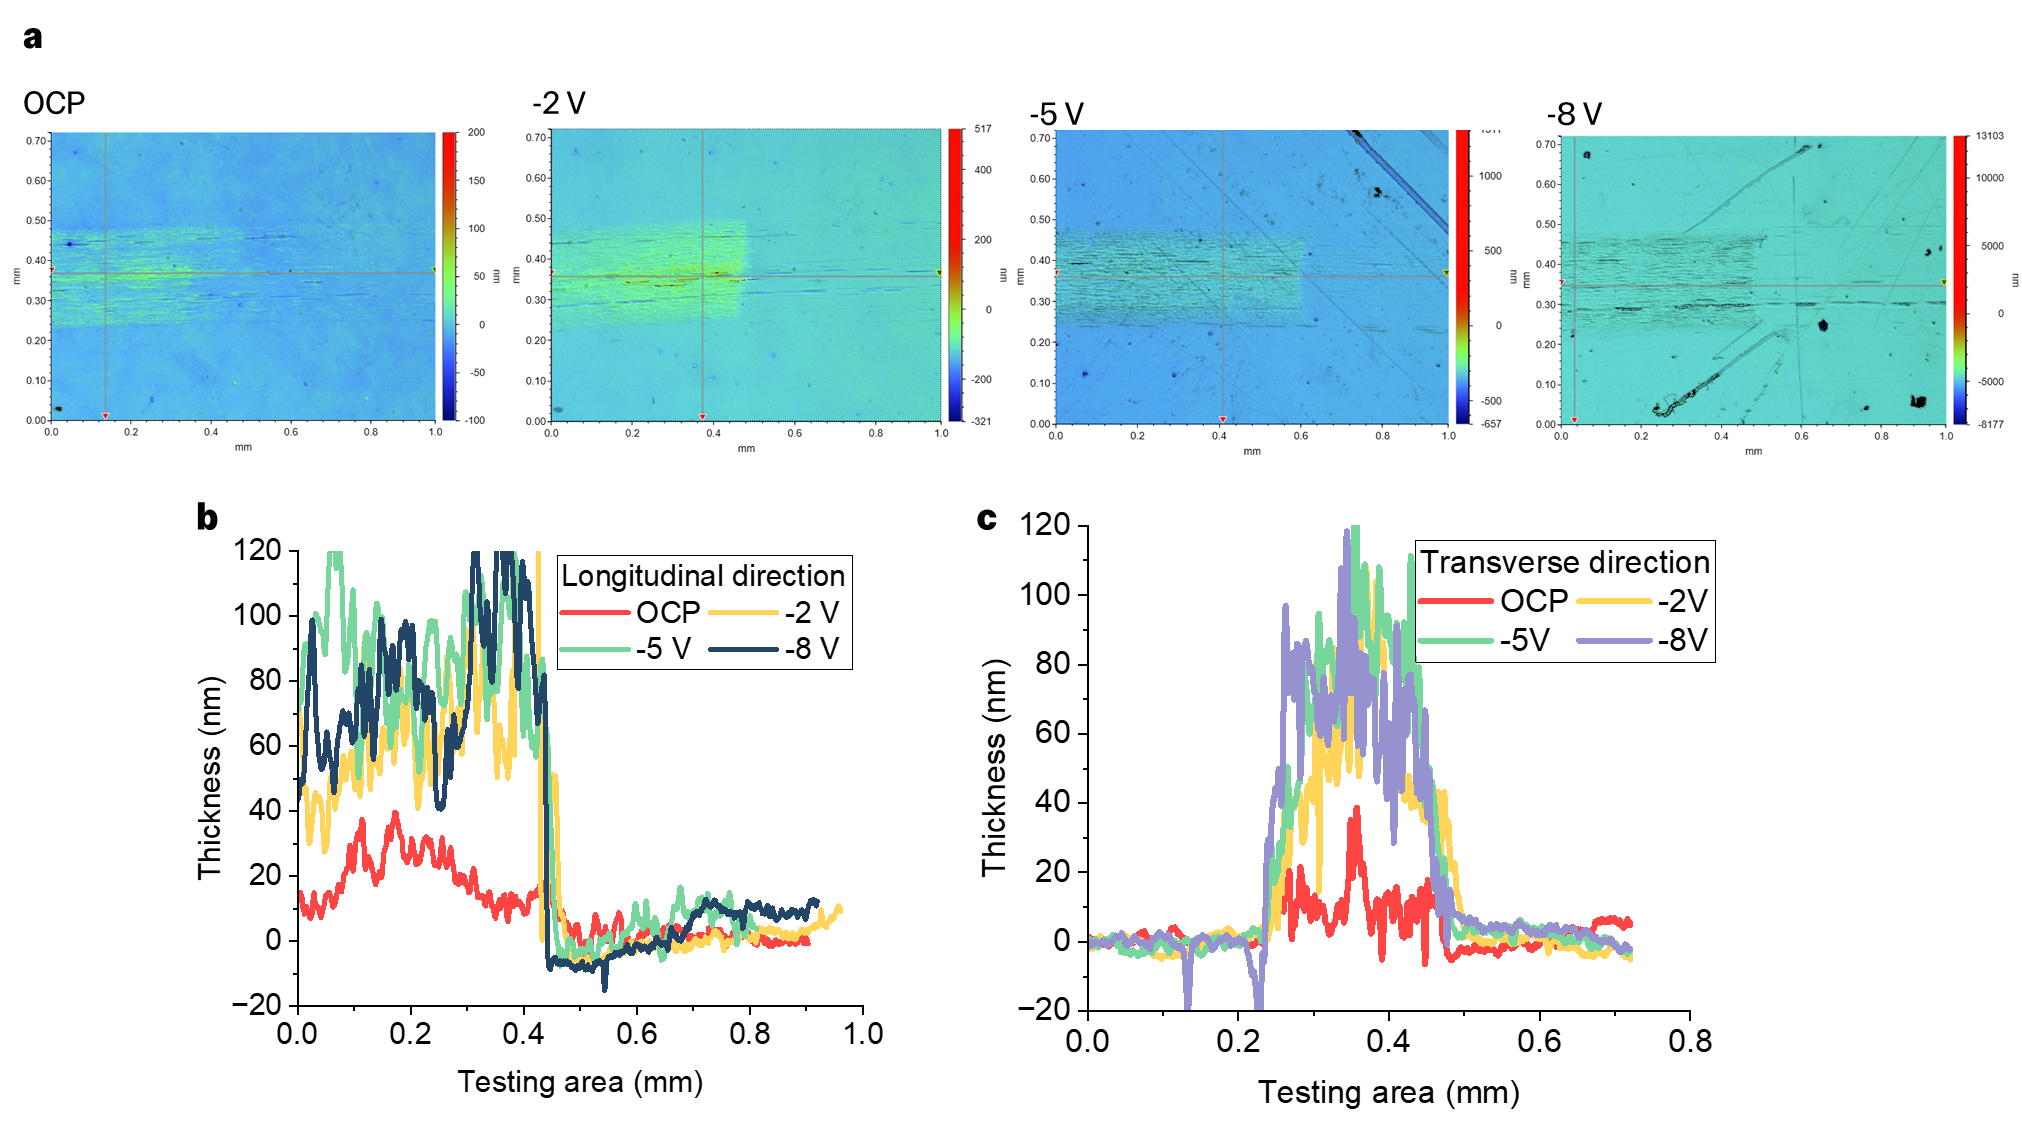


**Figure S3.** Tribofilm thickness profiles across the wear track formed under different applied voltages.


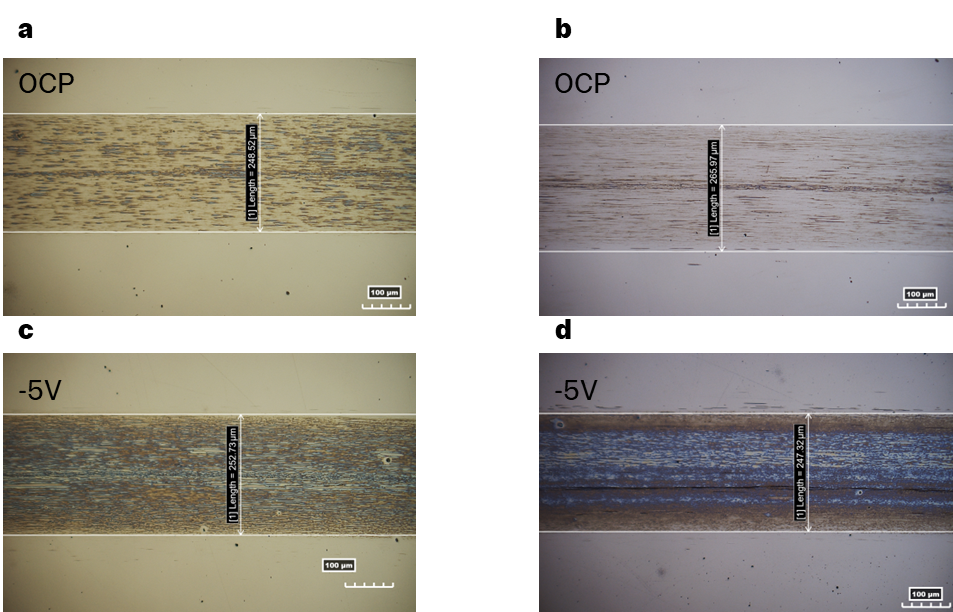


**Figure S4.** Two sets of repeat tests: (**a**, **b**) optical microscope images of wear tracks generated under OCP conditions, and (**c**, **d**) wear tracks generated under -5 V.


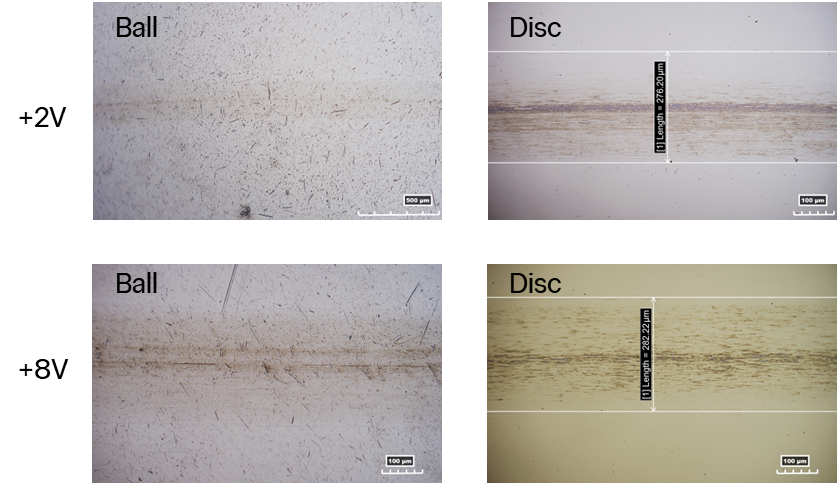


**Figure S5.** Optical microscope images of the ball and disc surfaces under positive voltage conditions.
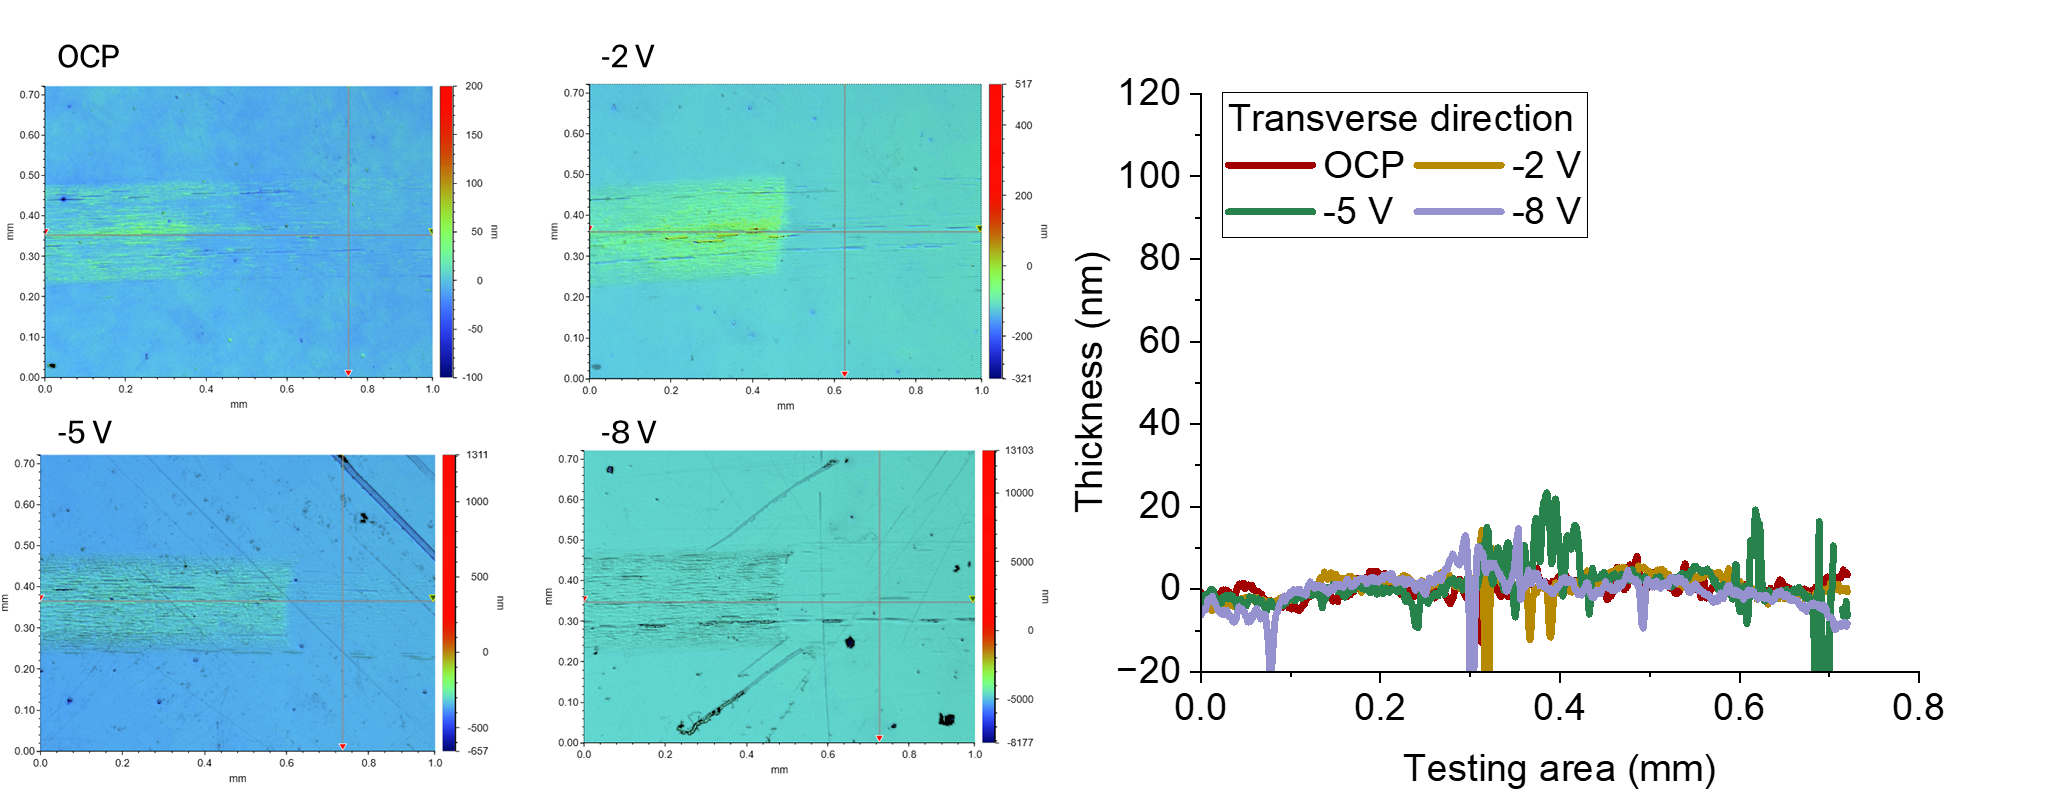


**Figure S6.** Tribofilm results of BEPite in PAO2 rubbing for 120 mins under applied voltage conditions.


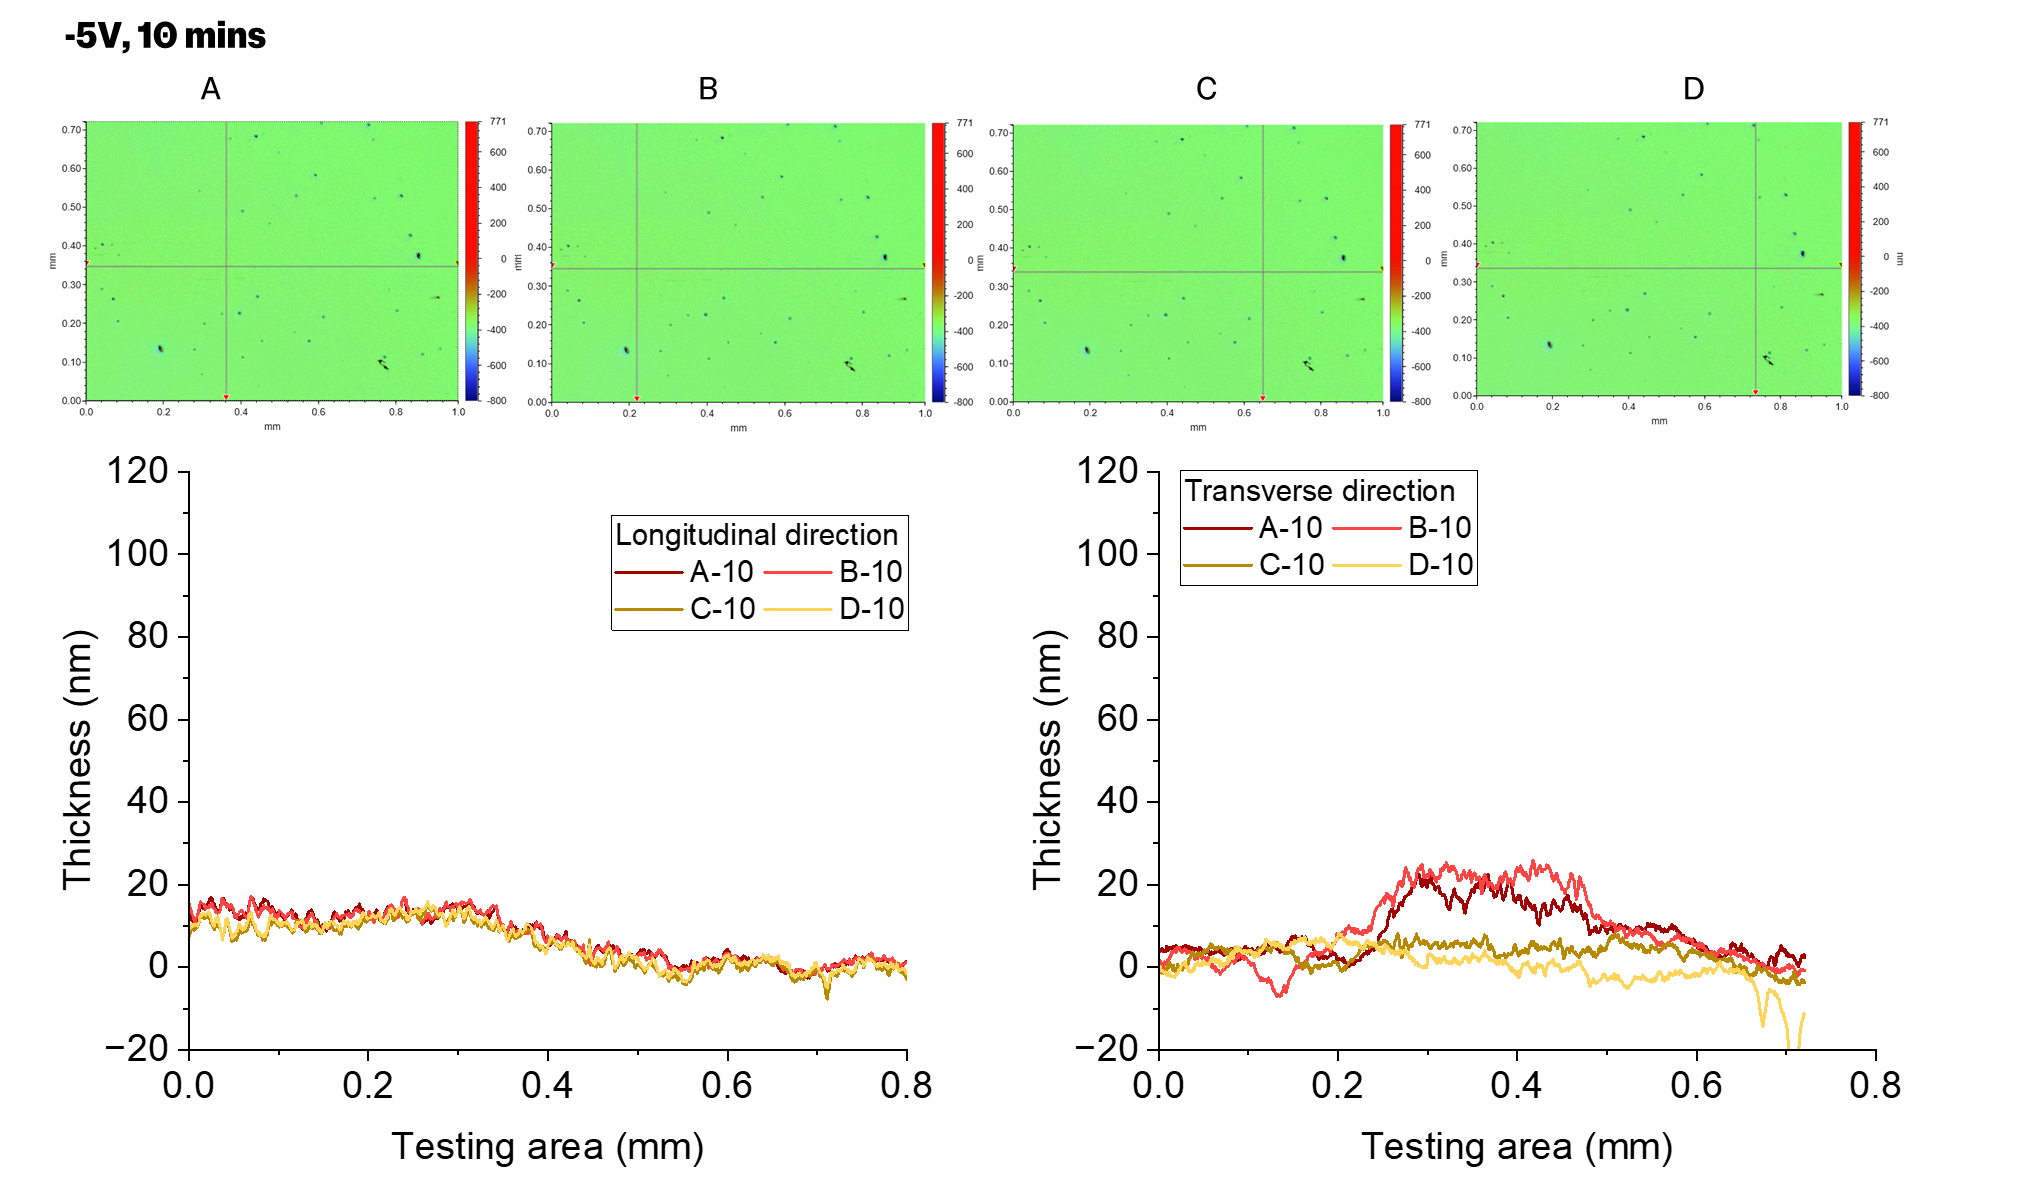


**Figure S7.** Tribofilm results of BEPite in PAO2 rubbing for 10 mins under -5V.


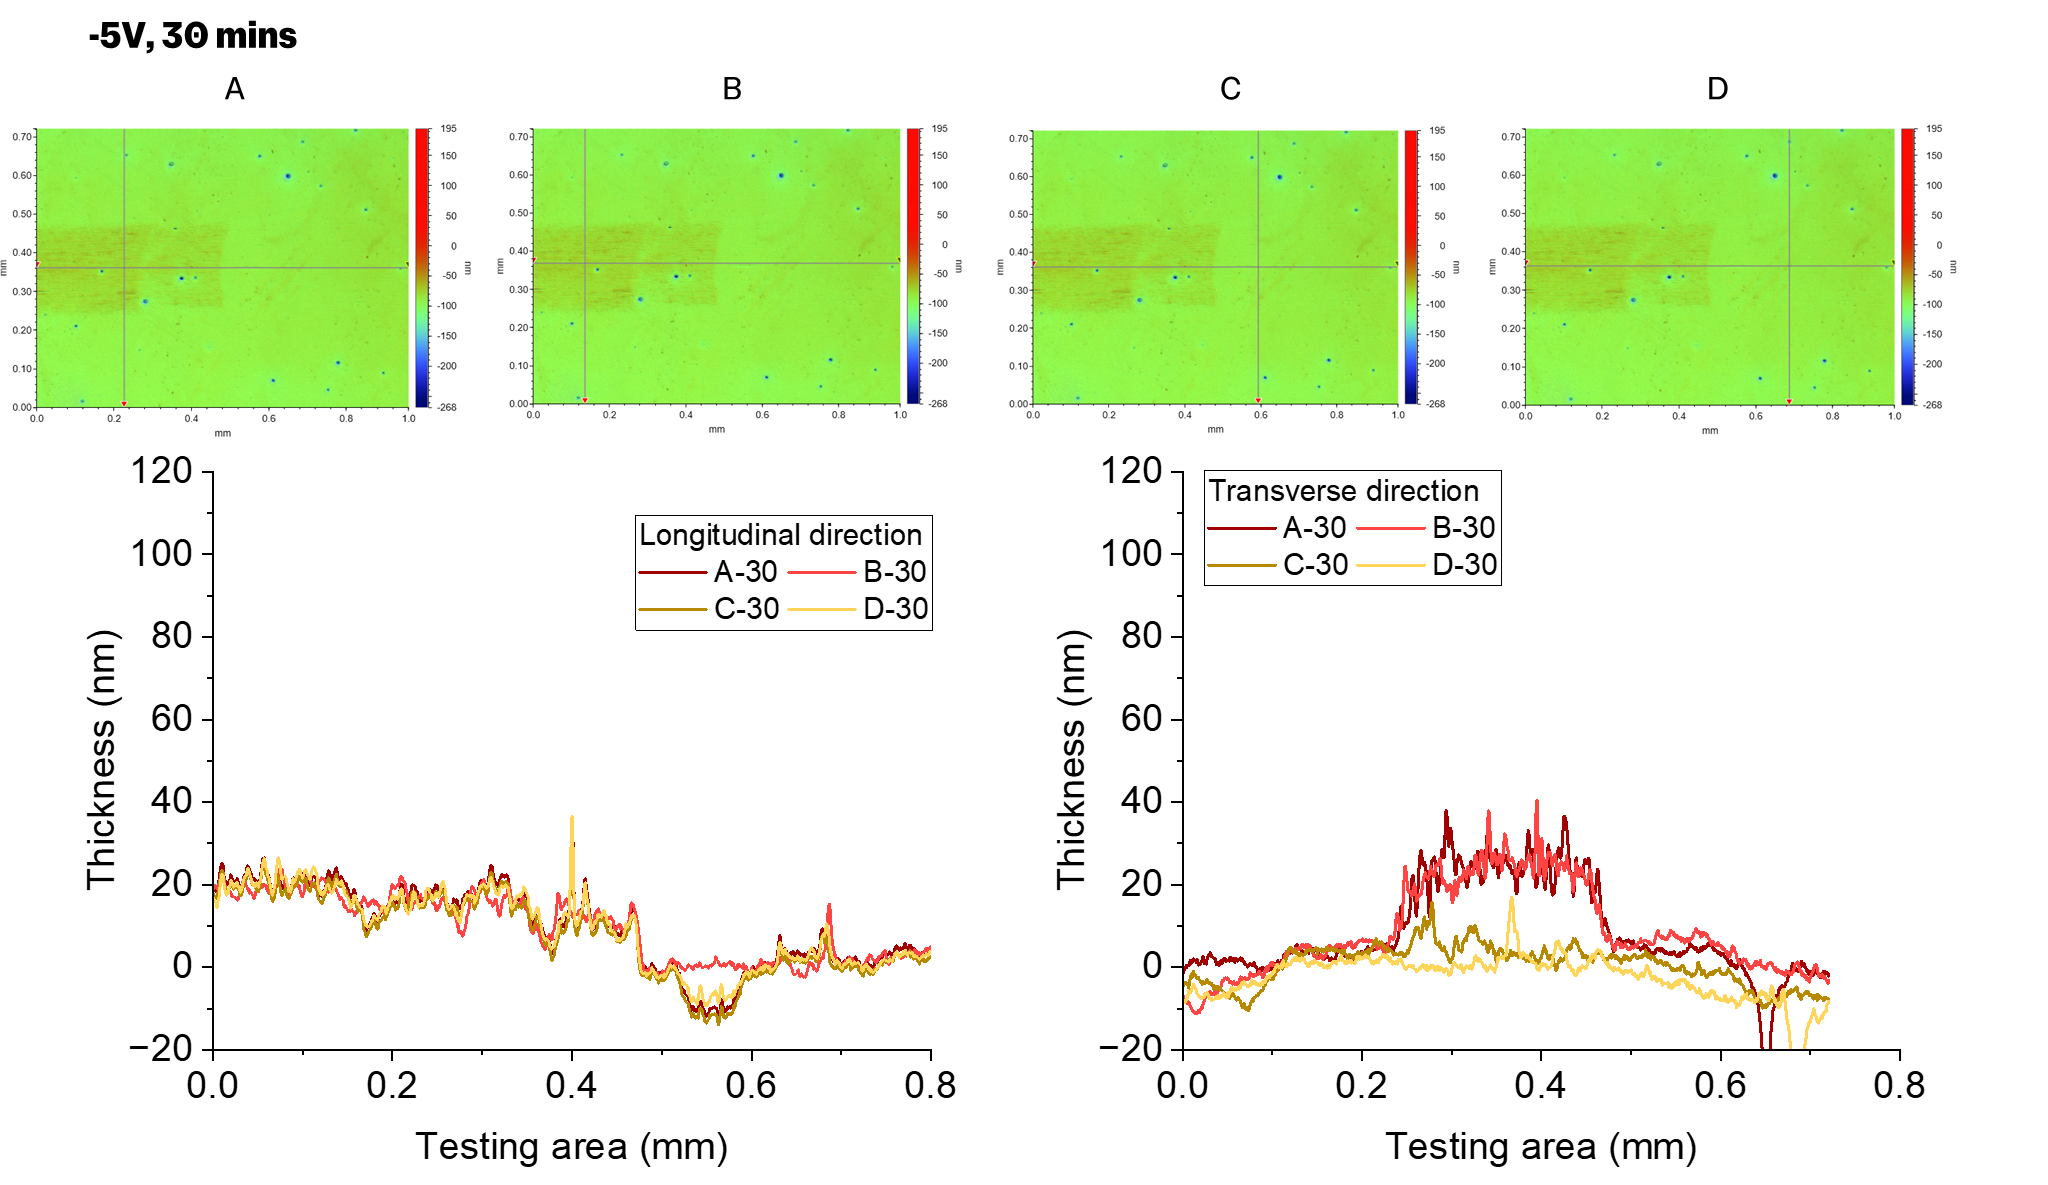


**Figure S8.** Tribofilm results of BEPite in PAO2 rubbing for 30 mins under -5V.


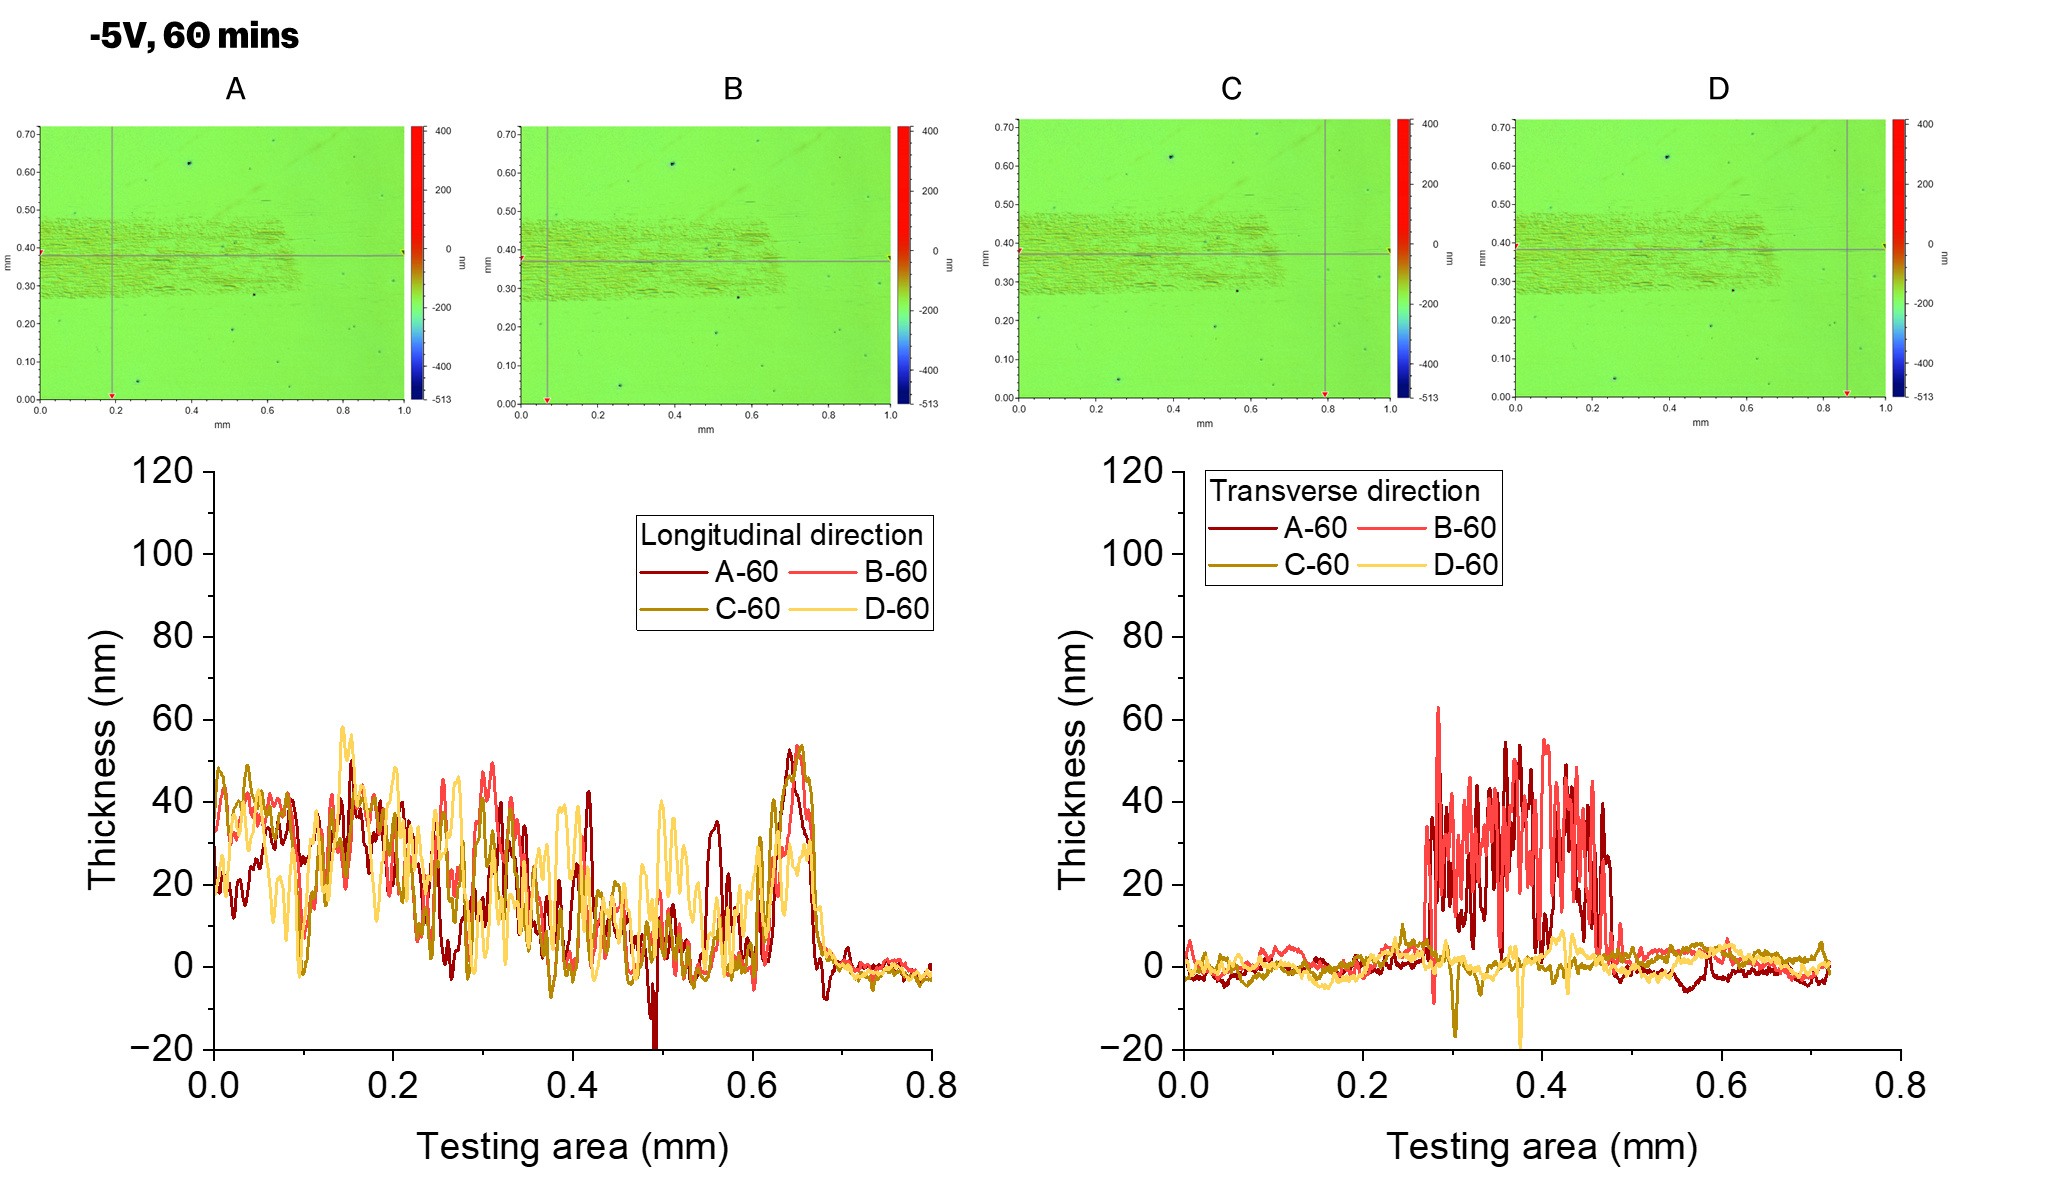


**Figure S9.** Tribofilm results of BEPite in PAO2 rubbing for 60 mins under -5V.


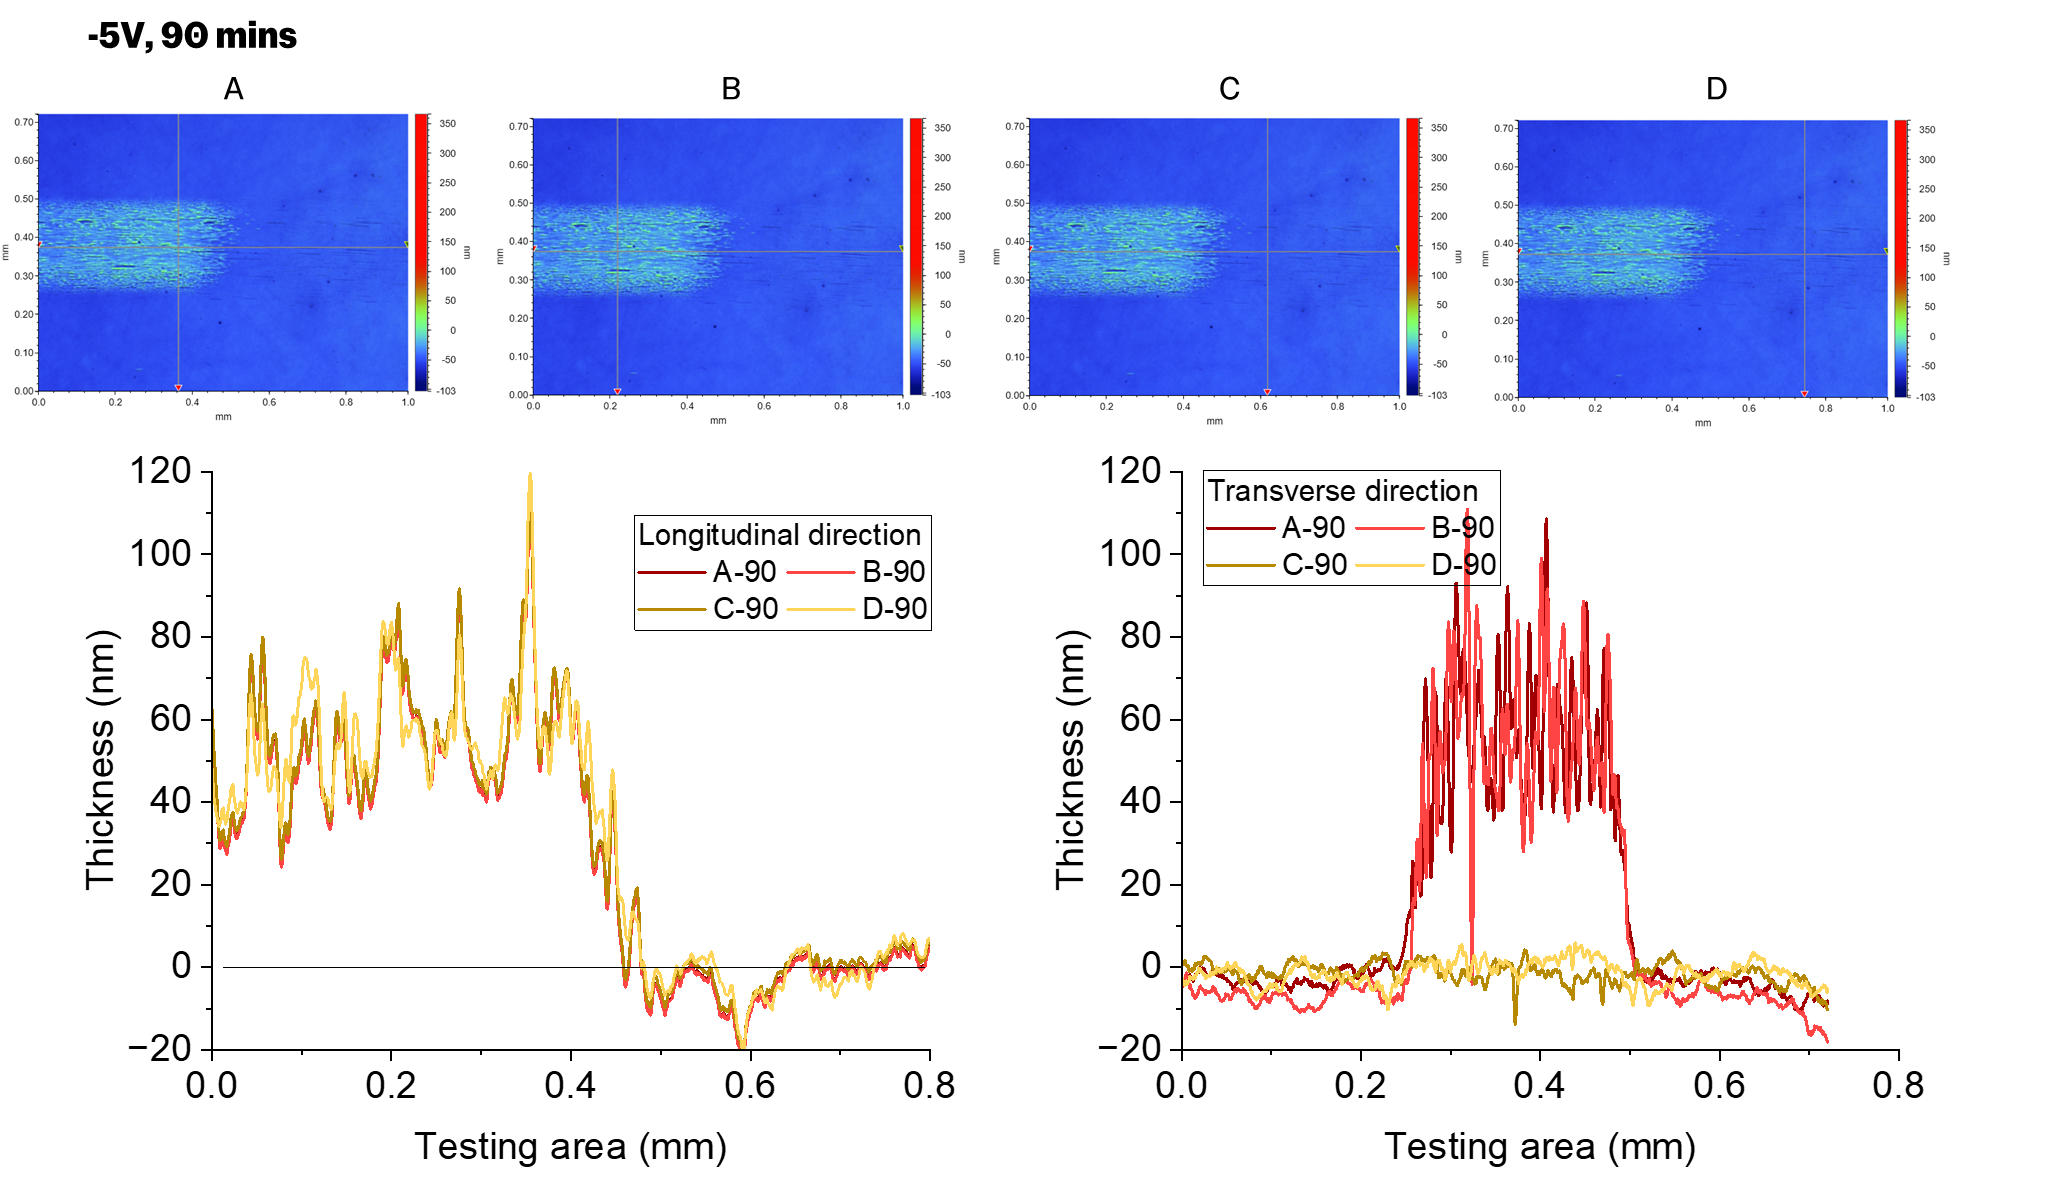


**Figure S10.** Tribofilm results of BEPite in PAO2 rubbing for 90 mins under -5V.


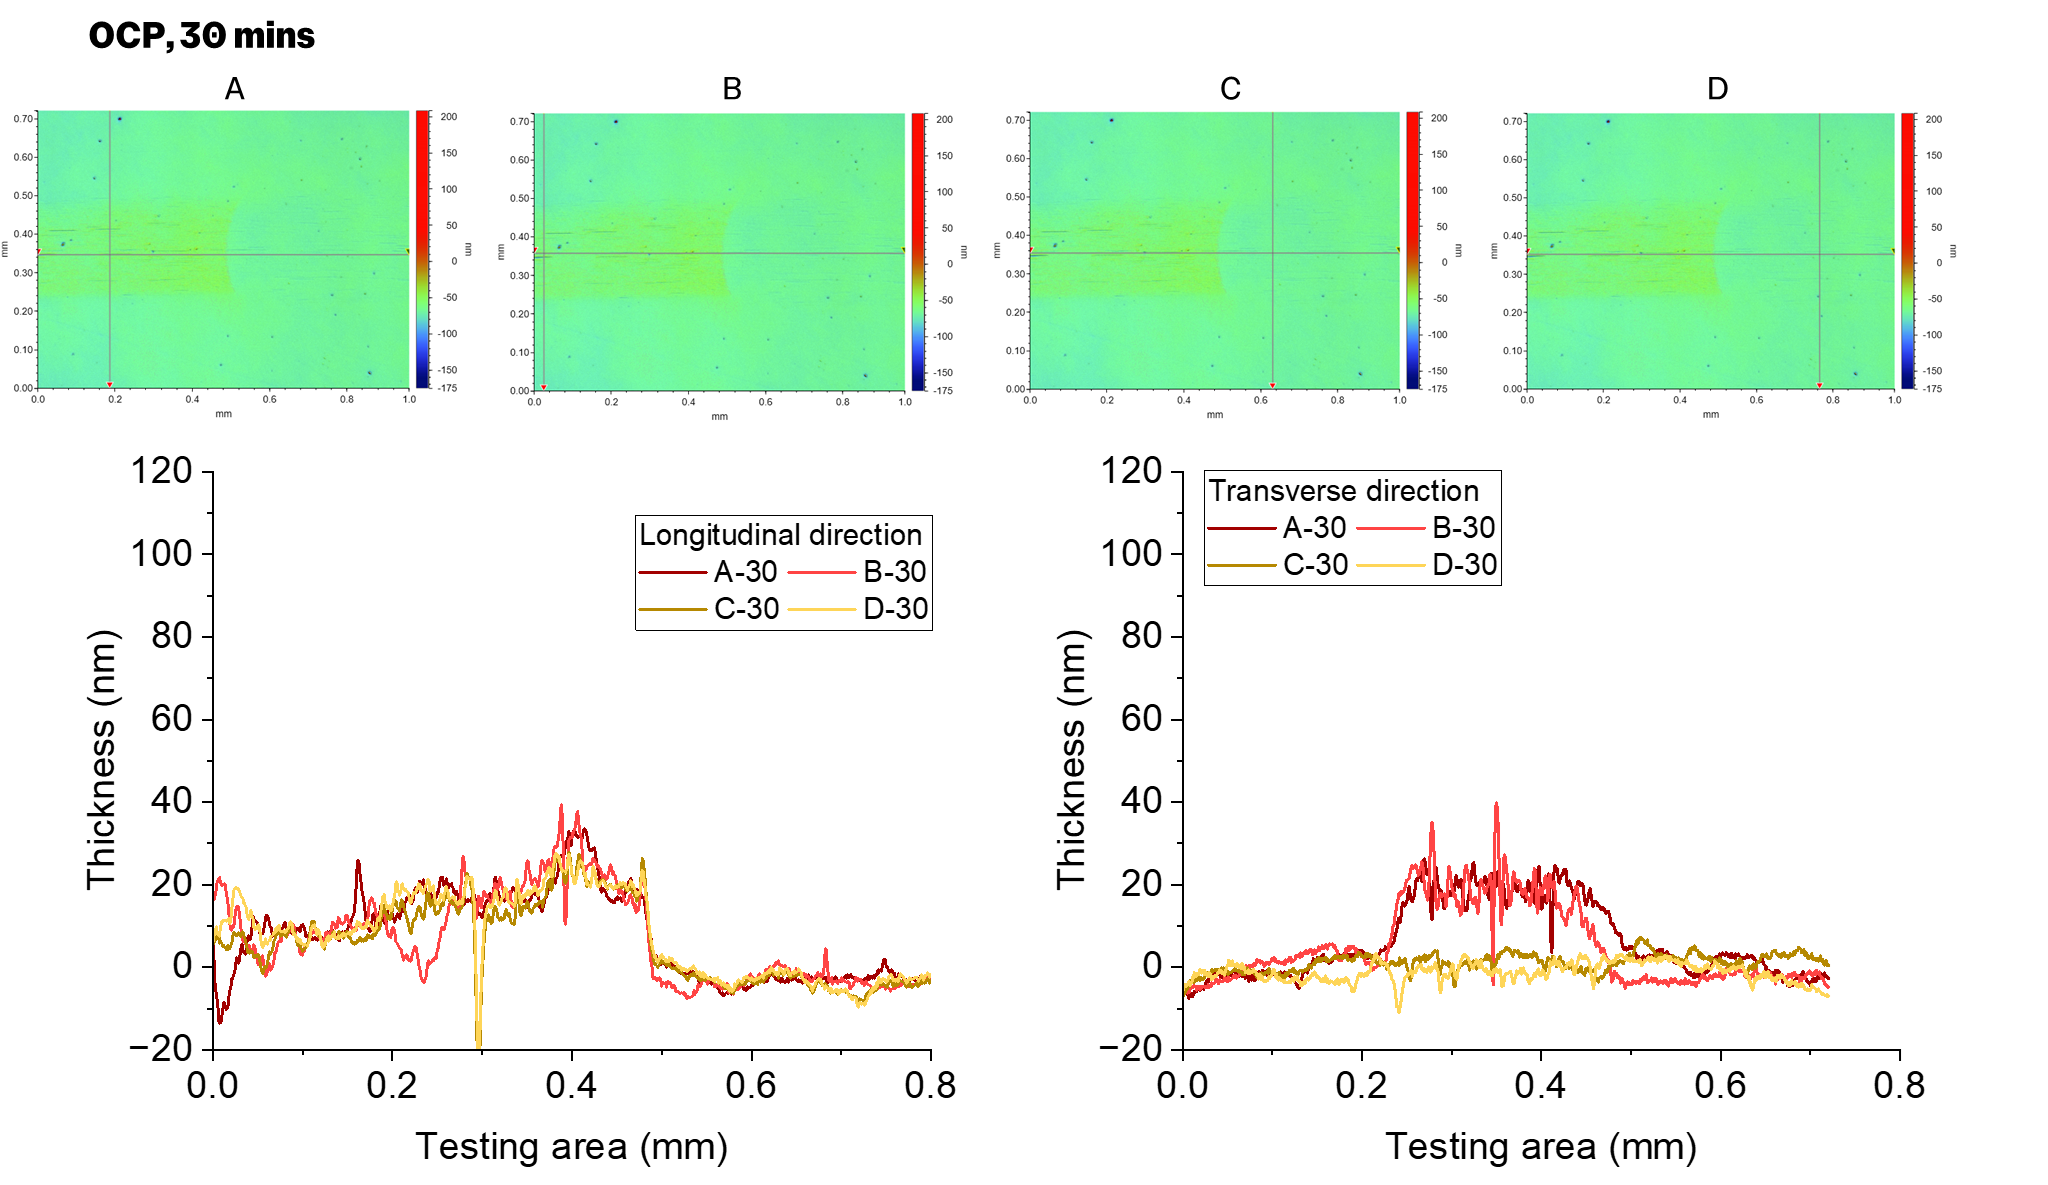


**Figure S11.** Tribofilm results of BEPite in PAO2 rubbing for 30 mins under OCP.


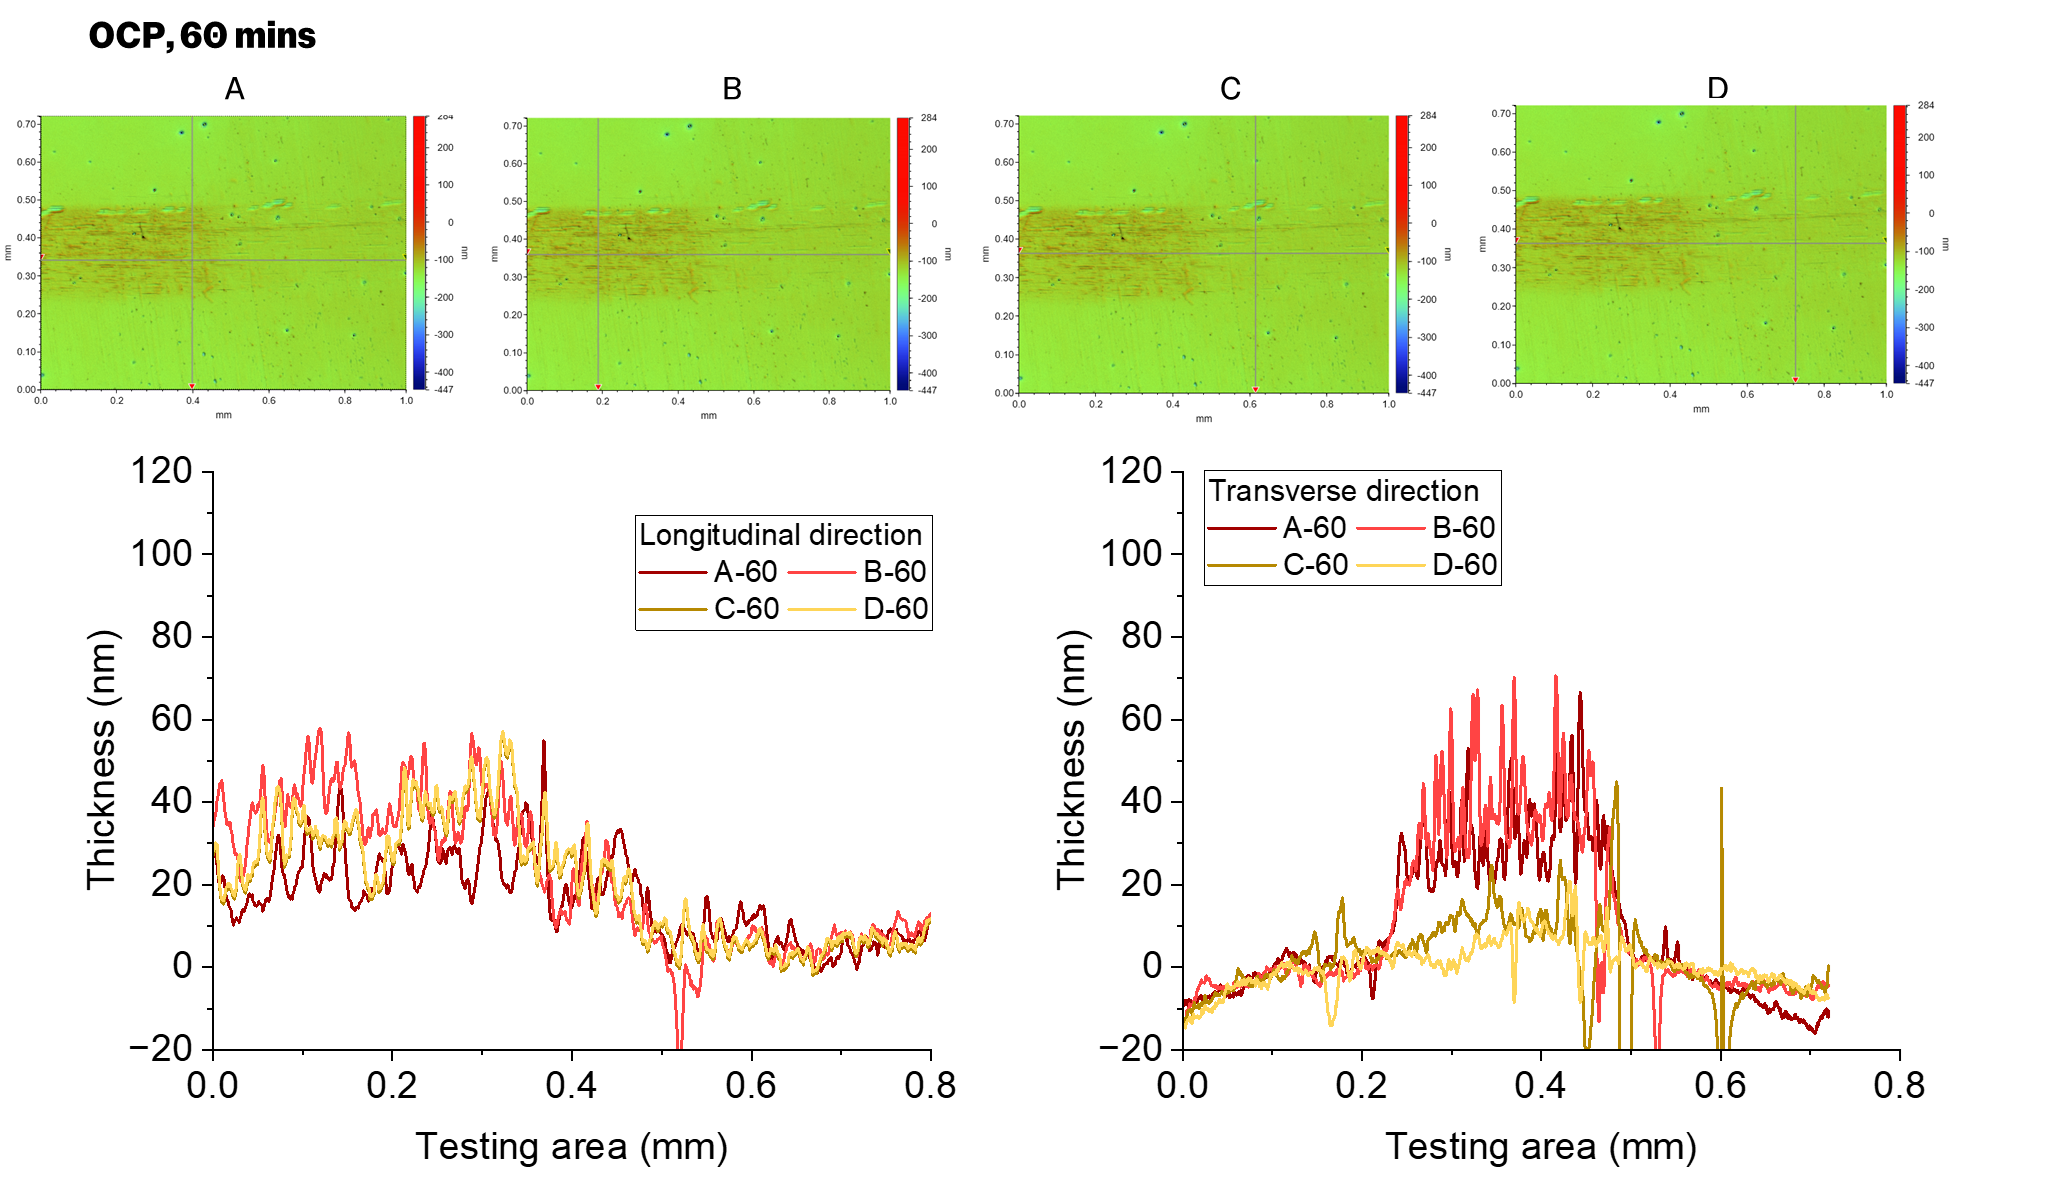


**Figure S12.** Tribofilm results of BEPite in PAO2 rubbing for 60 mins under OCP.


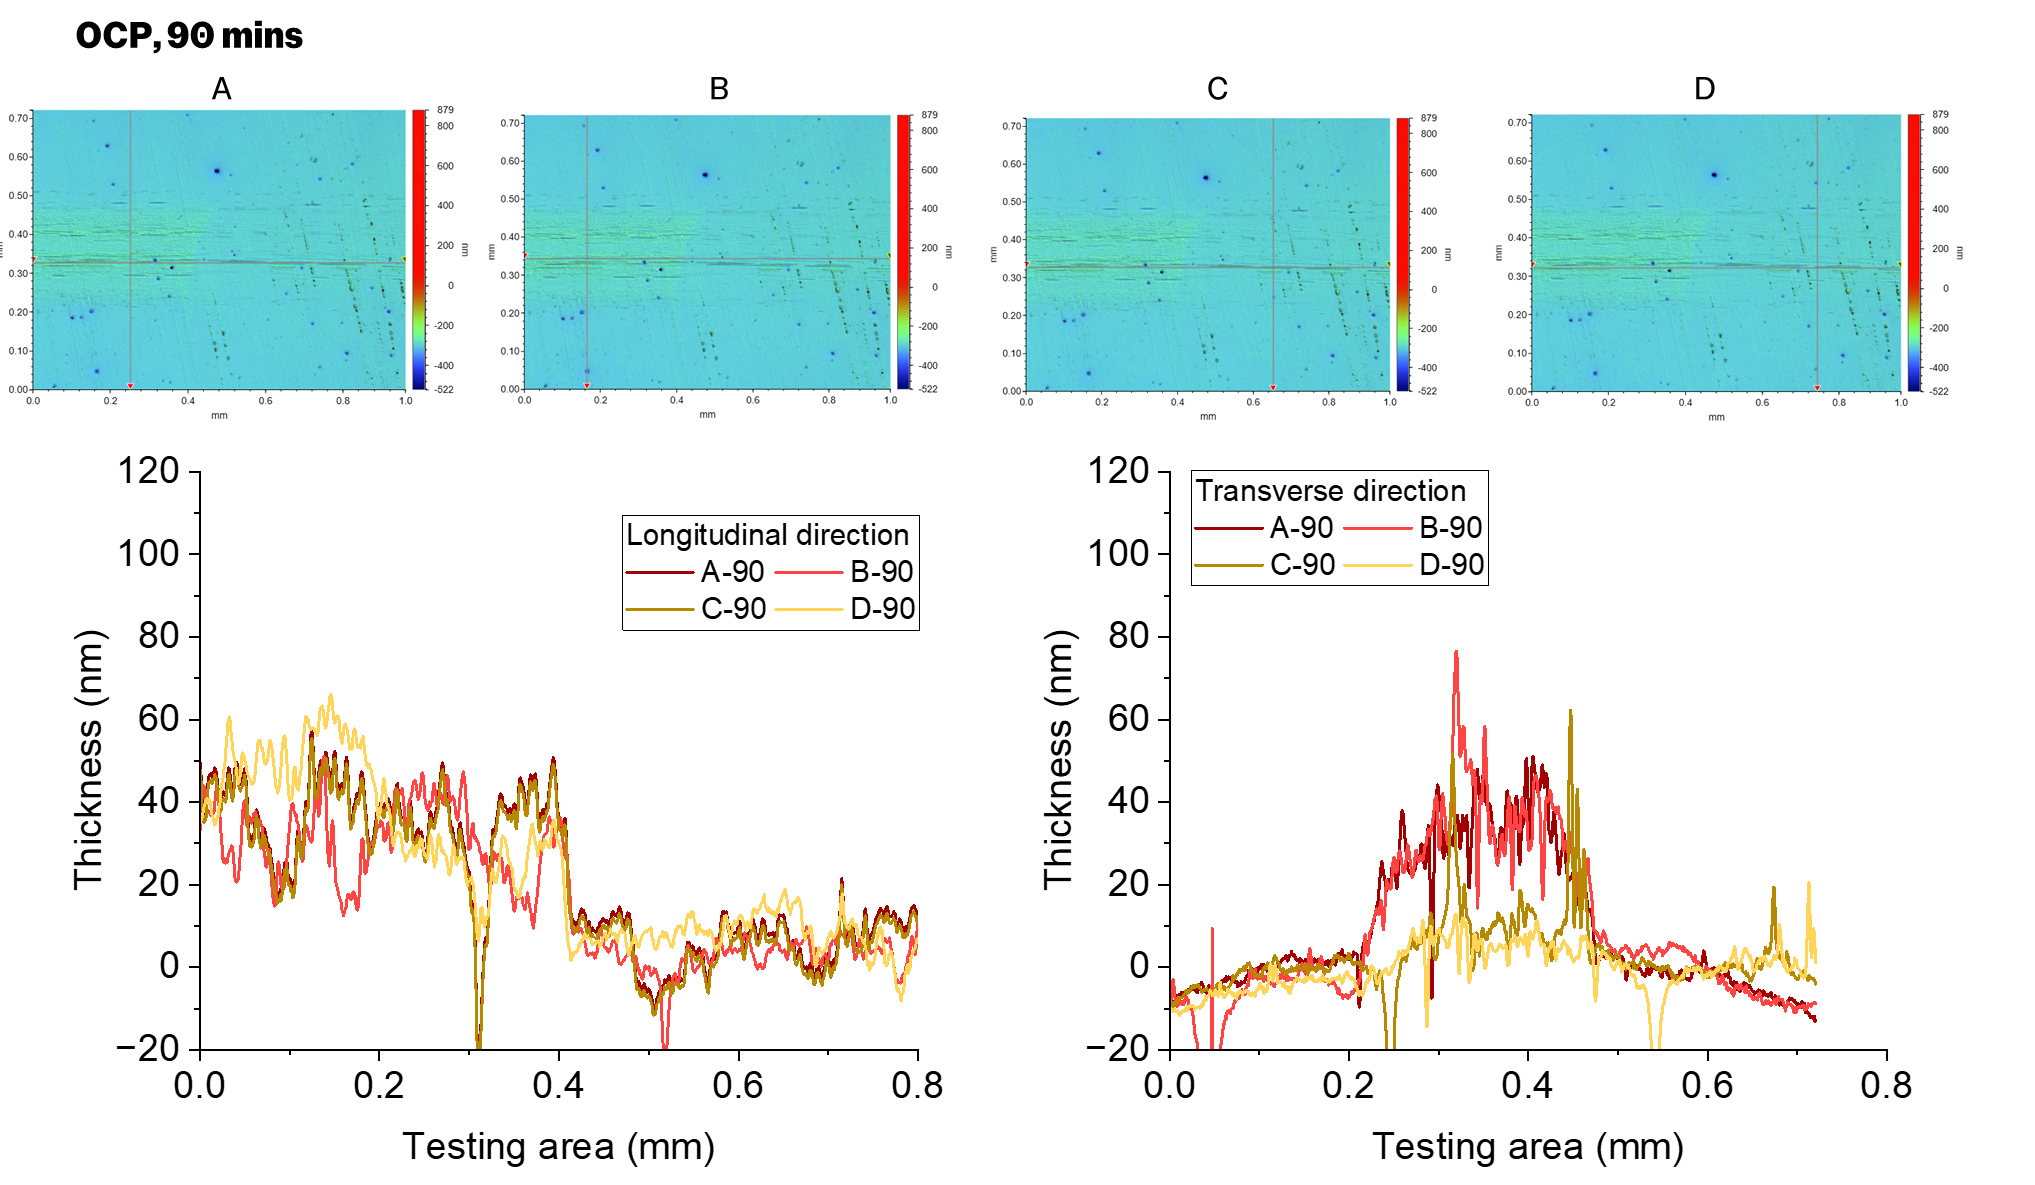


**Figure S13.** Tribofilm results of BEPite in PAO2 rubbing for 90 mins under OCP.


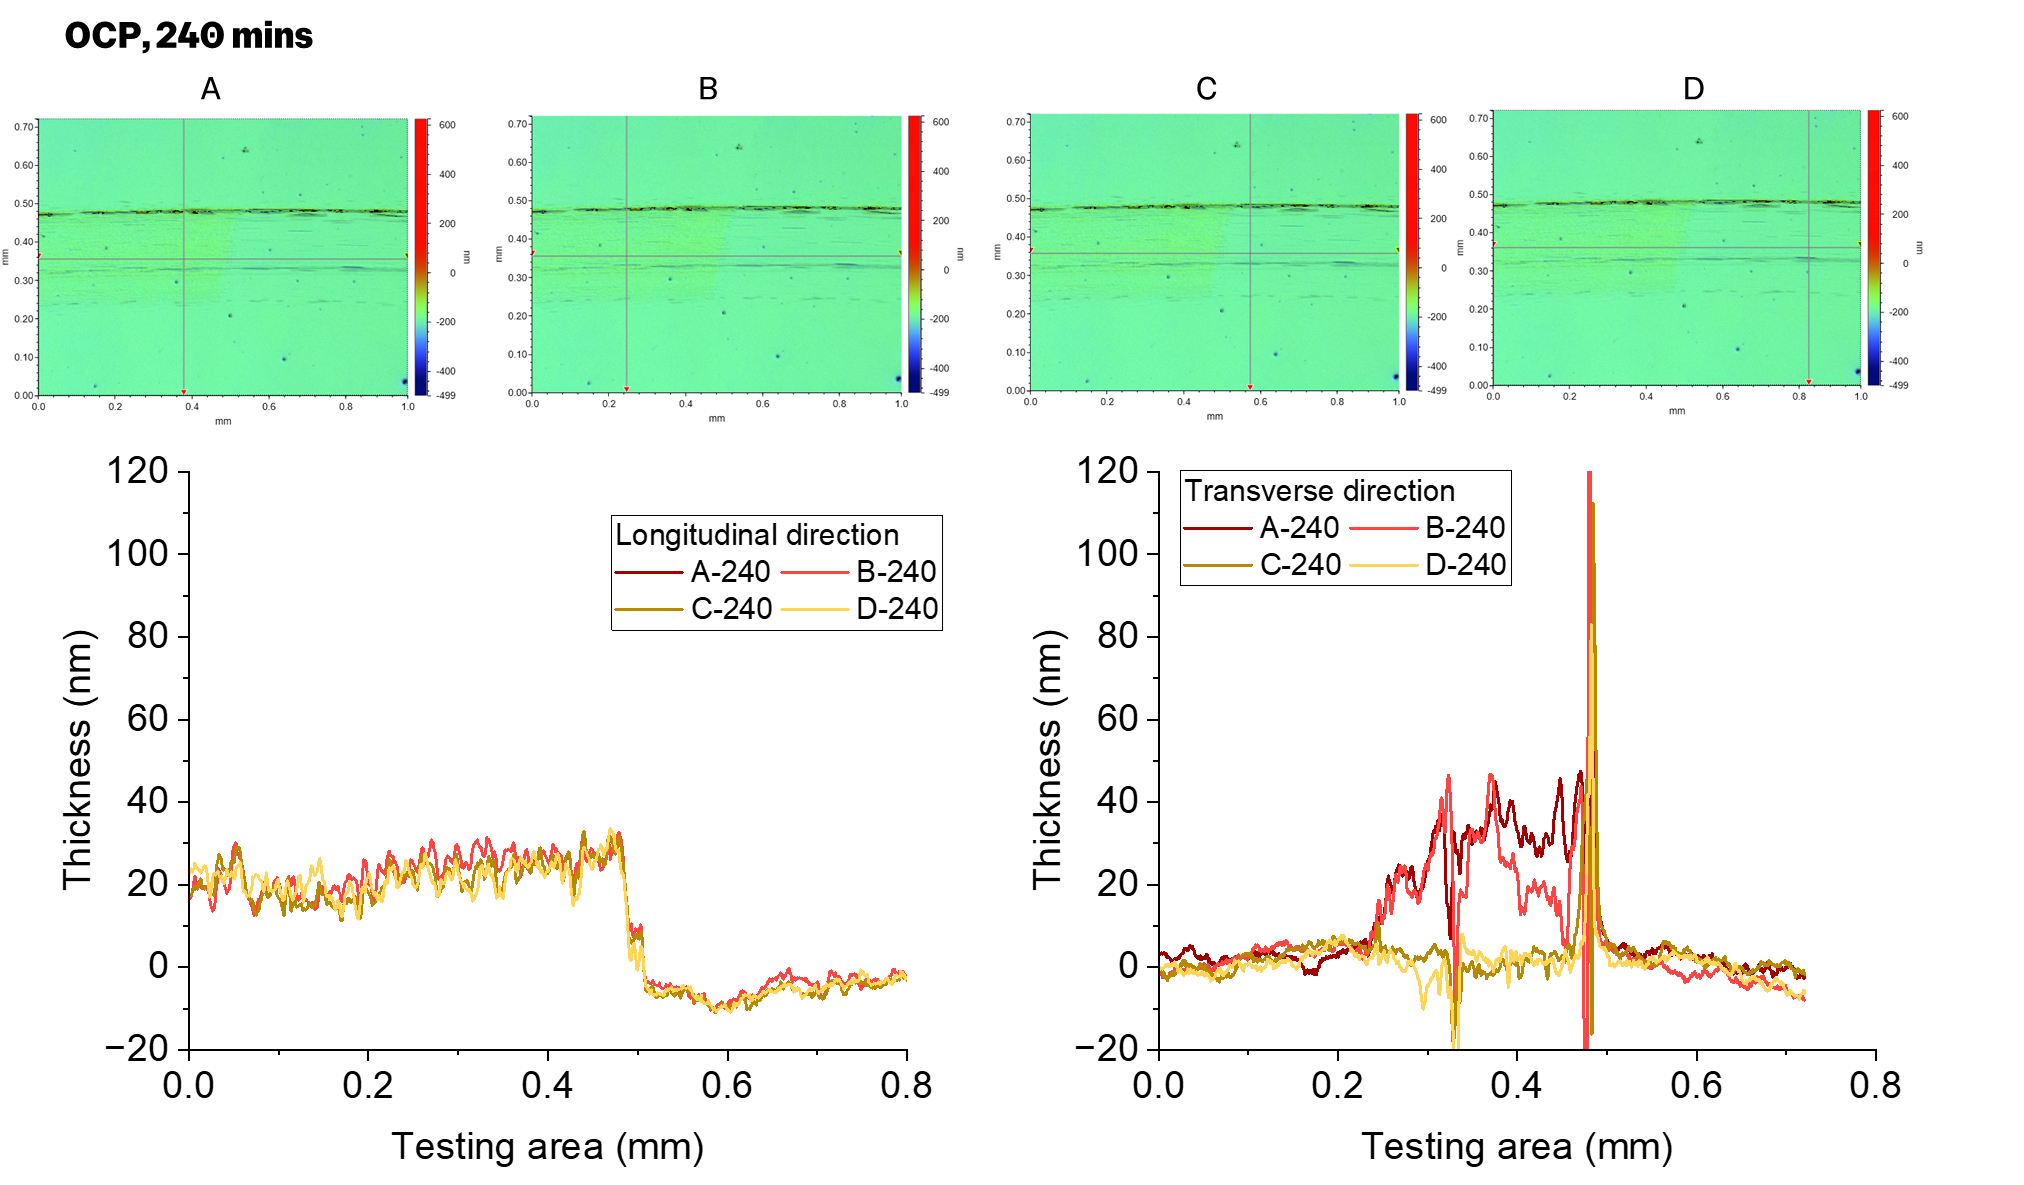


**Figure S14.** Tribofilm results of BEPite in PAO2 rubbing for 240 mins under OCP.


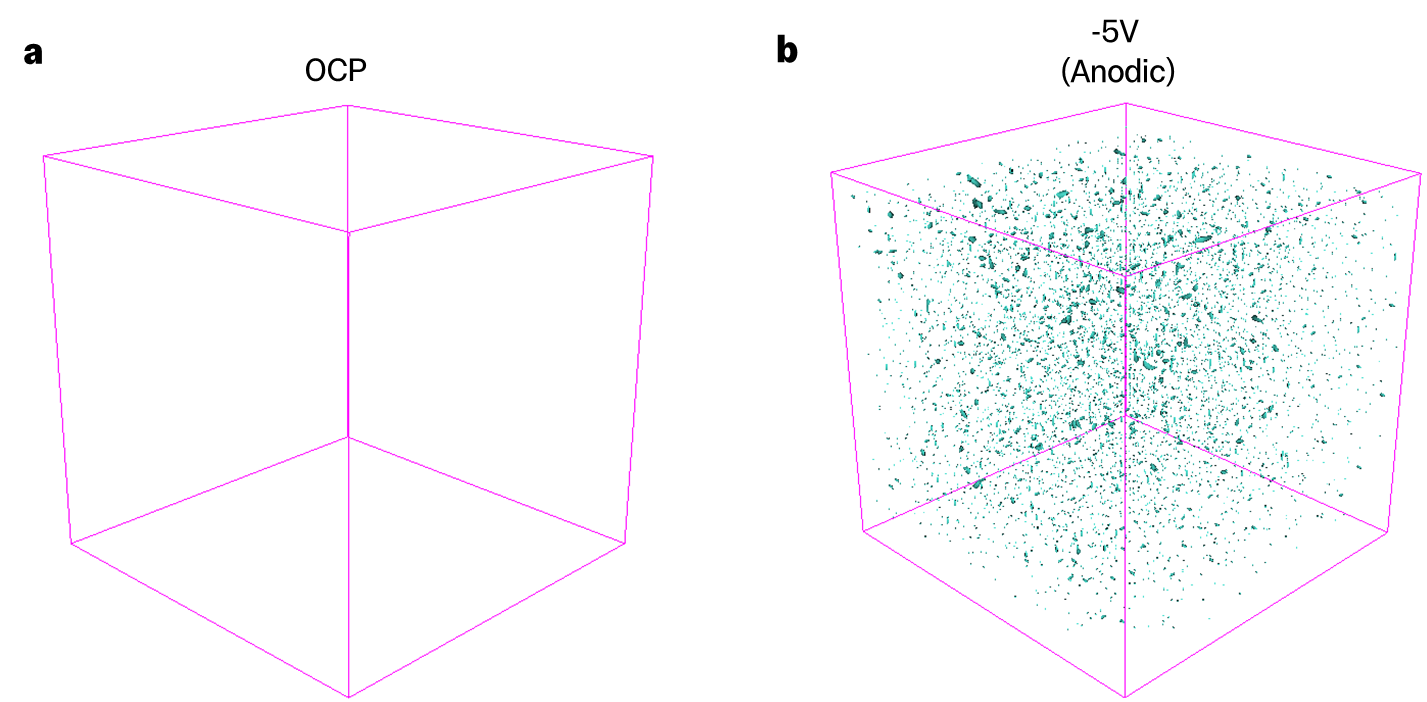


**Figure S15.** 3D TOF-SIMS tomographic reconstruction of PO4- distribution of discs treated at OCP (**a**) and -5V (**b**).


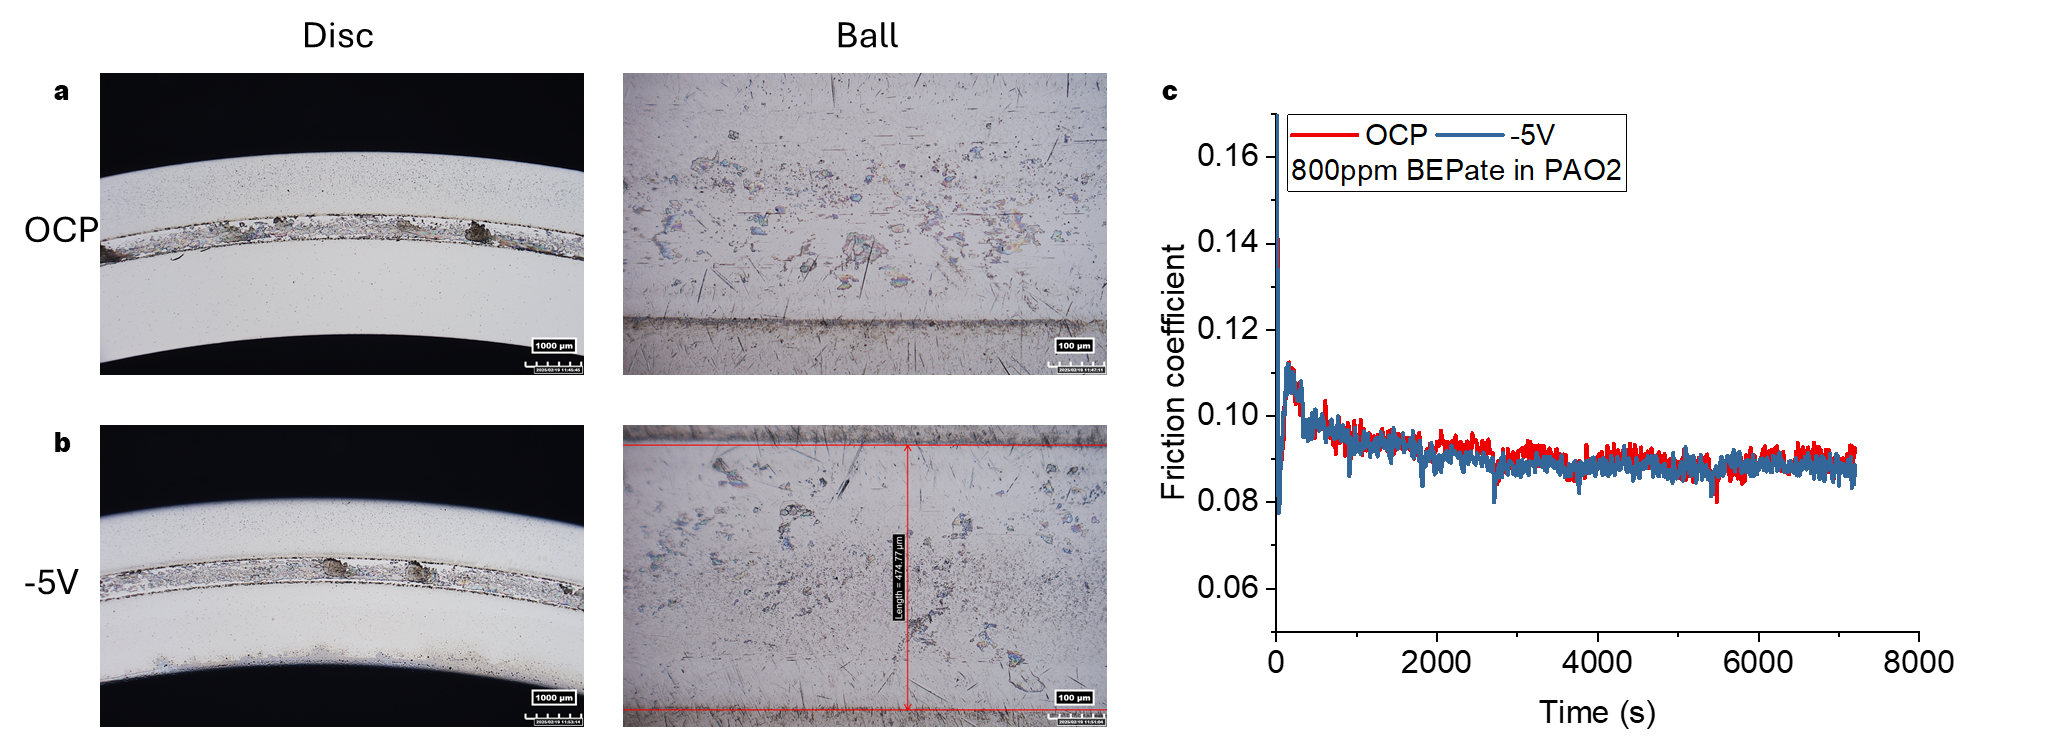


**Figure S16.** **a.** Wear track of diisopropyl phosphite in PAO2 at OCP. **b.** Wear track of diisopropyl phosphite in PAO2 at -5V. **c.** COF results of diisopropyl phosphite in PAO2.

**Figure S17.** Raman spectroscopy of discs treated at applied voltage conditions.


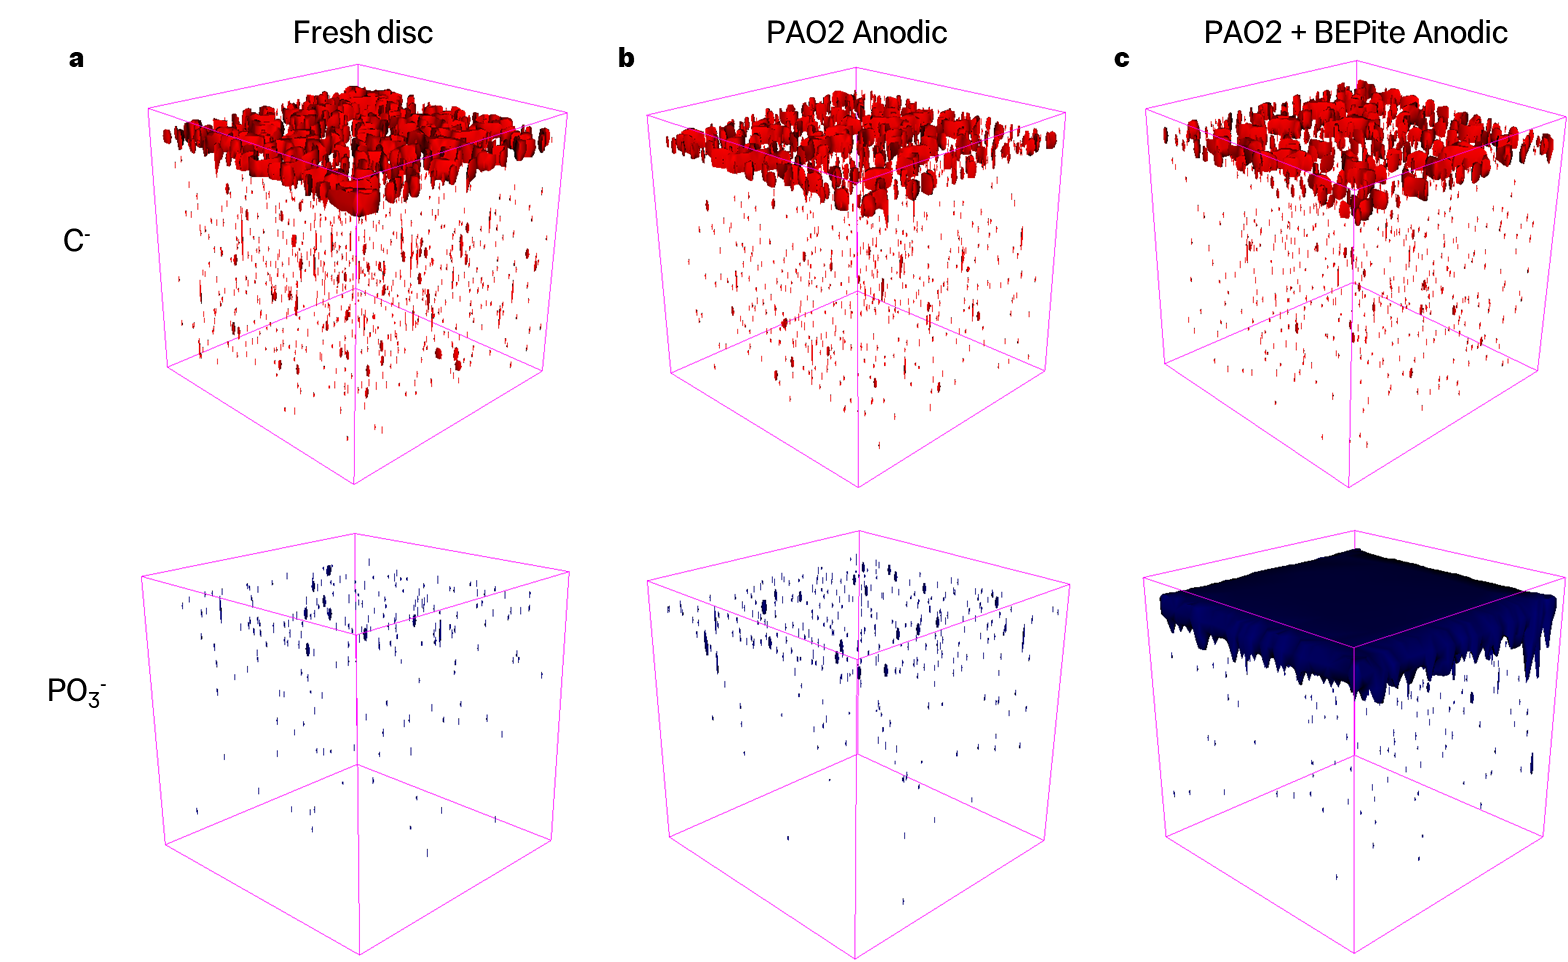


**Figure S18.** 3D TOF-SIMS tomographic reconstruction of C- and PO3- distribution of discs. **a.** Fresh disc. **b.** Disc treated in PAO2 at -5 V. **c.** Disc treated in BEPite in PAO2 at -5 V.


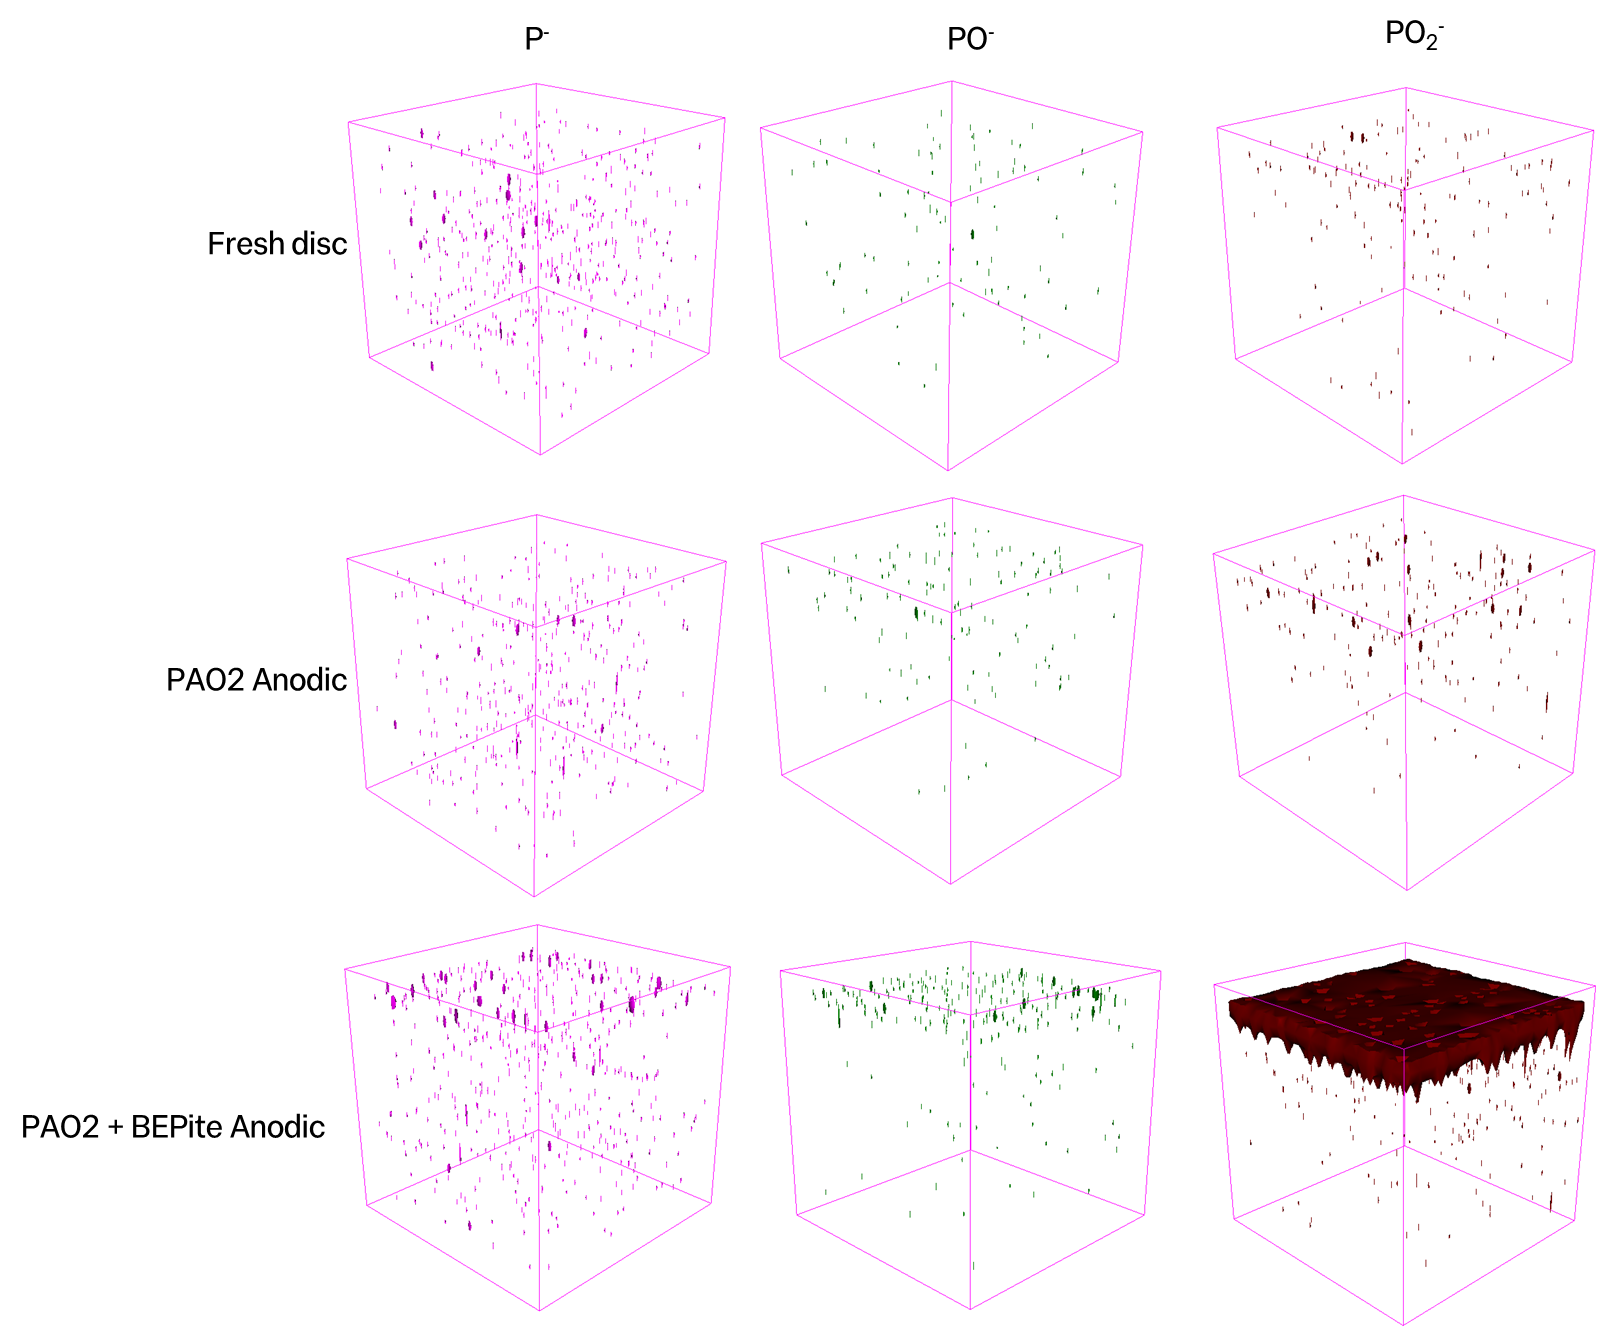


**Figure S19.** 3D TOF-SIMS tomographic reconstruction of P-, PO- and PO2- distribution of discs.
